# Supplementary material for: A Nomogram based on Inflammatory Factors C-Reactive Protein and Fibrinogen to Predict the Prognostic Value in Patients with Resected Non-Small Cell Lung Cancer
Source: PubMed Central journal article supplement — J Cancer. 2017 Feb 25;8(5):744–53. doi: 10.7150/jca.17423 (PMC5381162; doi:10.7150/jca.17423), 2017-02-25
Supplement: jcav08p0744s1.pdf [file jcav08p0744s1.pdf]

Table S1 Comparison of performance in nomogram

| Model                               | C index/statistic | 95%CI       |
|-------------------------------------|-------------------|-------------|
| Nomogram based CRP and fibrinogen   | 0.720             | 0.671-0.769 |
| the 7th edition AJCC TNM            | 0.689             | 0.668-0.709 |
| Liang's nomogram <sup>a</sup>       | 0.710             | 0.700-0.720 |
| Oberije's nomogram <sup>b</sup>     | 0.620             | 0.610-0.660 |
| Tanvetyanon's nomogram <sup>c</sup> | 0.713             | -           |

Table S2 Point Assignment and Prognostic Score of the 7th edition of AJCC TNM classifications

| Variable and Prognostic Score | Score | Estimated 5-Year Overall Survival (%) |
|-------------------------------|-------|---------------------------------------|
| T group Points                |       |                                       |
| T3-T4                         | 0     |                                       |
| T1-T2                         | 82    |                                       |
| LNM Points                    |       |                                       |
| Positive                      | 0     |                                       |
| Negative                      | 85    |                                       |
| Stage group Points            |       |                                       |
| III-IV                        | 0     |                                       |
| I-II                          | 100   |                                       |
| Metastasis Points             |       |                                       |
| Positive                      | 0     |                                       |
| Negative                      | 62    |                                       |
| Total prognostic Score        |       |                                       |
| 0-158                         |       | 16                                    |
| 158-258                       |       | 34                                    |
| 258-352                       |       | -                                     |
| ≥352                          |       | -                                     |
